# Supplementary material
Source: ML conference proceedings conference paper supplement (https://proceedings.neurips.cc/paper_files/paper/2022/hash/6d5e035724687454549b97d6c805dc84-Abstract.html)
Supplement: Supplementary file 1 [file 6d5e035724687454549b97d6c805dc84-Supplemental-Conference.zip]

Archive with 138 entries (124 files):
- Supplementary_material/
- __MACOSX/._Supplementary_material
- Supplementary_material/.DS_Store
- __MACOSX/Supplementary_material/._.DS_Store
- Supplementary_material/code/
- __MACOSX/Supplementary_material/._code
- Supplementary_material/appendix.pdf
- __MACOSX/Supplementary_material/._appendix.pdf
- Supplementary_material/code/.DS_Store
- __MACOSX/Supplementary_material/code/._.DS_Store
- Supplementary_material/code/requirements.txt
- __MACOSX/Supplementary_material/code/._requirements.txt
- Supplementary_material/code/lag_caVAE/
- __MACOSX/Supplementary_material/code/._lag_caVAE
- Supplementary_material/code/datasets/
- __MACOSX/Supplementary_material/code/._datasets
- Supplementary_material/code/README.md
- __MACOSX/Supplementary_material/code/._README.md
- Supplementary_material/code/utils.py
- __MACOSX/Supplementary_material/code/._utils.py
- Supplementary_material/code/examples/
- __MACOSX/Supplementary_material/code/._examples
- Supplementary_material/code/hyperspherical_vae/
- __MACOSX/Supplementary_material/code/._hyperspherical_vae
- Supplementary_material/code/parse.py
- __MACOSX/Supplementary_material/code/._parse.py
- Supplementary_material/code/myenv/
- __MACOSX/Supplementary_material/code/._myenv
- Supplementary_material/code/lag_caVAE/leap.py
- __MACOSX/Supplementary_material/code/lag_caVAE/._leap.py
- Supplementary_material/code/lag_caVAE/__pycache__/
- __MACOSX/Supplementary_material/code/lag_caVAE/.___pycache__
- Supplementary_material/code/lag_caVAE/nn_models.py
- __MACOSX/Supplementary_material/code/lag_caVAE/._nn_models.py
- Supplementary_material/code/lag_caVAE/lag.py
- __MACOSX/Supplementary_material/code/lag_caVAE/._lag.py
- Supplementary_material/code/datasets/pendulum-gym-image-dataset-train_L1.0-1.0_mu0.01-0.01_Hz20_sL125_nS100_DaFalse_Sv0.5-4.0_Sp-3.141592653589793-3.141592653589793.pkl
- __MACOSX/Supplementary_material/code/datasets/._pendulum-gym-image-dataset-train_L1.0-1.0_mu0.01-0.01_Hz20_sL125_nS100_DaFalse_Sv0.5-4.0_Sp-3.141592653589793-3.141592653589793.pkl
- Supplementary_material/code/datasets/massspringdamper-gym-image-dataset-train_cSS4000.0-4000000.0_Hz100_sL125_nS1000_cF50_fr25_DaFalse_iE0.0-0.01_tH2.15_U0_sP100--0.5-0.7.pkl
- __MACOSX/Supplementary_material/code/datasets/._massspringdamper-gym-image-dataset-train_cSS4000.0-4000000.0_Hz100_sL125_nS1000_cF50_fr25_DaFalse_iE0.0-0.01_tH2.15_U0_sP100--0.5-0.7.pkl
- Supplementary_material/code/datasets/pendulum-gym-image-dataset_L1.0-1.0_mu0.01-0.01_Hz20_sL125_nS100_DaFalse_Sv0.5-4.0_Sp-3.141592653589793-3.141592653589793.pkl
- __MACOSX/Supplementary_material/code/datasets/._pendulum-gym-image-dataset_L1.0-1.0_mu0.01-0.01_Hz20_sL125_nS100_DaFalse_Sv0.5-4.0_Sp-3.141592653589793-3.141592653589793.pkl
- Supplementary_material/code/datasets/pendulum-gym-image-dataset-test_L1.0-1.0_mu0.01-0.01_Hz20_sL125_nS100_DaFalse_Sv0.5-4.0_Sp-3.141592653589793-3.141592653589793.pkl
- __MACOSX/Supplementary_material/code/datasets/._pendulum-gym-image-dataset-test_L1.0-1.0_mu0.01-0.01_Hz20_sL125_nS100_DaFalse_Sv0.5-4.0_Sp-3.141592653589793-3.141592653589793.pkl
- Supplementary_material/code/datasets/twobody-gym-image-dataset_m11.0-1.0_m21.0-1.0_Hz6_sL125_nS1000_DaFalse_R0.4-1.0_smallBall.pkl
- __MACOSX/Supplementary_material/code/datasets/._twobody-gym-image-dataset_m11.0-1.0_m21.0-1.0_Hz6_sL125_nS1000_DaFalse_R0.4-1.0_smallBall.pkl
- Supplementary_material/code/datasets/twobody-gym-image-dataset-test_m11.0-1.0_m21.0-1.0_Hz6_sL125_nS1000_DaFalse_R0.4-1.0_smallBall.pkl
- __MACOSX/Supplementary_material/code/datasets/._twobody-gym-image-dataset-test_m11.0-1.0_m21.0-1.0_Hz6_sL125_nS1000_DaFalse_R0.4-1.0_smallBall.pkl
- Supplementary_material/code/datasets/massspringdamper-gym-image-dataset-test_cSS4000.0-4000000.0_Hz100_sL125_nS1000_cF50_fr25_DaFalse_iE0.0-0.01_tH2.15_U0_sP100--0.5-0.7.pkl
- __MACOSX/Supplementary_material/code/datasets/._massspringdamper-gym-image-dataset-test_cSS4000.0-4000000.0_Hz100_sL125_nS1000_cF50_fr25_DaFalse_iE0.0-0.01_tH2.15_U0_sP100--0.5-0.7.pkl
- Supplementary_material/code/datasets/massspringdamper-gym-image-dataset_cSS4000.0-4000000.0_Hz100_sL125_nS1000_cF50_fr25_DaFalse_iE0.0-0.01_tH2.15_U0_sP100--0.5-0.7.pkl
- __MACOSX/Supplementary_material/code/datasets/._massspringdamper-gym-image-dataset_cSS4000.0-4000000.0_Hz100_sL125_nS1000_cF50_fr25_DaFalse_iE0.0-0.01_tH2.15_U0_sP100--0.5-0.7.pkl
- Supplementary_material/code/datasets/twobody-gym-image-dataset-train_m11.0-1.0_m21.0-1.0_Hz6_sL125_nS1000_DaFalse_R0.4-1.0_smallBall.pkl
- __MACOSX/Supplementary_material/code/datasets/._twobody-gym-image-dataset-train_m11.0-1.0_m21.0-1.0_Hz6_sL125_nS1000_DaFalse_R0.4-1.0_smallBall.pkl
- Supplementary_material/code/examples/vehicle_steering.py
- __MACOSX/Supplementary_material/code/examples/._vehicle_steering.py
- Supplementary_material/code/examples/tb_lag_cavae_trainer.py
- __MACOSX/Supplementary_material/code/examples/._tb_lag_cavae_trainer.py
- Supplementary_material/code/examples/README.md
- __MACOSX/Supplementary_material/code/examples/._README.md
- Supplementary_material/code/examples/pend_cdm_trainer.py
- __MACOSX/Supplementary_material/code/examples/._pend_cdm_trainer.py
- Supplementary_material/code/examples/pend_lag_cavae_trainer.py
- __MACOSX/Supplementary_material/code/examples/._pend_lag_cavae_trainer.py
- Supplementary_material/code/hyperspherical_vae/__init__.py
- __MACOSX/Supplementary_material/code/hyperspherical_vae/.___init__.py
- Supplementary_material/code/hyperspherical_vae/__pycache__/
- __MACOSX/Supplementary_material/code/hyperspherical_vae/.___pycache__
- Supplementary_material/code/hyperspherical_vae/README.md
- __MACOSX/Supplementary_material/code/hyperspherical_vae/._README.md
- Supplementary_material/code/hyperspherical_vae/ops/
- __MACOSX/Supplementary_material/code/hyperspherical_vae/._ops
- Supplementary_material/code/hyperspherical_vae/distributions/
- __MACOSX/Supplementary_material/code/hyperspherical_vae/._distributions
- Supplementary_material/code/myenv/fa_cartpole.py
- __MACOSX/Supplementary_material/code/myenv/._fa_cartpole.py
- Supplementary_material/code/myenv/fa_acrobot.py
- __MACOSX/Supplementary_material/code/myenv/._fa_acrobot.py
- Supplementary_material/code/myenv/rendering.py
- __MACOSX/Supplementary_material/code/myenv/._rendering.py
- Supplementary_material/code/myenv/__init__.py
- __MACOSX/Supplementary_material/code/myenv/.___init__.py
- Supplementary_material/code/myenv/__pycache__/
- __MACOSX/Supplementary_material/code/myenv/.___pycache__
- Supplementary_material/code/myenv/README.md
- __MACOSX/Supplementary_material/code/myenv/._README.md
- Supplementary_material/code/myenv/twobody.py
- __MACOSX/Supplementary_material/code/myenv/._twobody.py
- Supplementary_material/code/myenv/pendulum.py
- __MACOSX/Supplementary_material/code/myenv/._pendulum.py
- Supplementary_material/code/myenv/massspringdamper.py
- __MACOSX/Supplementary_material/code/myenv/._massspringdamper.py
- Supplementary_material/code/lag_caVAE/__pycache__/nn_models.cpython-37.pyc
- __MACOSX/Supplementary_material/code/lag_caVAE/__pycache__/._nn_models.cpython-37.pyc
- Supplementary_material/code/lag_caVAE/__pycache__/lag.cpython-37.pyc
- __MACOSX/Supplementary_material/code/lag_caVAE/__pycache__/._lag.cpython-37.pyc
- Supplementary_material/code/lag_caVAE/__pycache__/leap.cpython-37.pyc
- __MACOSX/Supplementary_material/code/lag_caVAE/__pycache__/._leap.cpython-37.pyc
- Supplementary_material/code/hyperspherical_vae/__pycache__/__init__.cpython-37.pyc
- __MACOSX/Supplementary_material/code/hyperspherical_vae/__pycache__/.___init__.cpython-37.pyc
- Supplementary_material/code/hyperspherical_vae/ops/__init__.py
- __MACOSX/Supplementary_material/code/hyperspherical_vae/ops/.___init__.py
- Supplementary_material/code/hyperspherical_vae/ops/__pycache__/
- __MACOSX/Supplementary_material/code/hyperspherical_vae/ops/.___pycache__
- Supplementary_material/code/hyperspherical_vae/ops/ive.py
- __MACOSX/Supplementary_material/code/hyperspherical_vae/ops/._ive.py
- Supplementary_material/code/hyperspherical_vae/distributions/__init__.py
- __MACOSX/Supplementary_material/code/hyperspherical_vae/distributions/.___init__.py
- Supplementary_material/code/hyperspherical_vae/distributions/__pycache__/
- __MACOSX/Supplementary_material/code/hyperspherical_vae/distributions/.___pycache__
- Supplementary_material/code/hyperspherical_vae/distributions/von_mises_fisher.py
- __MACOSX/Supplementary_material/code/hyperspherical_vae/distributions/._von_mises_fisher.py
- Supplementary_material/code/hyperspherical_vae/distributions/hyperspherical_uniform.py
- __MACOSX/Supplementary_material/code/hyperspherical_vae/distributions/._hyperspherical_uniform.py
- Supplementary_material/code/myenv/__pycache__/twobody.cpython-37.pyc
- __MACOSX/Supplementary_material/code/myenv/__pycache__/._twobody.cpython-37.pyc
- Supplementary_material/code/myenv/__pycache__/rendering.cpython-37.pyc
- __MACOSX/Supplementary_material/code/myenv/__pycache__/._rendering.cpython-37.pyc
- Supplementary_material/code/myenv/__pycache__/fa_cartpole.cpython-37.pyc
- __MACOSX/Supplementary_material/code/myenv/__pycache__/._fa_cartpole.cpython-37.pyc
- Supplementary_material/code/myenv/__pycache__/massspringdamper.cpython-37.pyc
- __MACOSX/Supplementary_material/code/myenv/__pycache__/._massspringdamper.cpython-37.pyc
- Supplementary_material/code/myenv/__pycache__/fa_acrobot.cpython-37.pyc
- __MACOSX/Supplementary_material/code/myenv/__pycache__/._fa_acrobot.cpython-37.pyc
- Supplementary_material/code/myenv/__pycache__/pendulum.cpython-37.pyc
- __MACOSX/Supplementary_material/code/myenv/__pycache__/._pendulum.cpython-37.pyc
- Supplementary_material/code/myenv/__pycache__/__init__.cpython-37.pyc
- __MACOSX/Supplementary_material/code/myenv/__pycache__/.___init__.cpython-37.pyc
- Supplementary_material/code/hyperspherical_vae/ops/__pycache__/ive.cpython-37.pyc
- __MACOSX/Supplementary_material/code/hyperspherical_vae/ops/__pycache__/._ive.cpython-37.pyc
- Supplementary_material/code/hyperspherical_vae/ops/__pycache__/__init__.cpython-37.pyc
- __MACOSX/Supplementary_material/code/hyperspherical_vae/ops/__pycache__/.___init__.cpython-37.pyc
- Supplementary_material/code/hyperspherical_vae/distributions/__pycache__/von_mises_fisher.cpython-37.pyc
- __MACOSX/Supplementary_material/code/hyperspherical_vae/distributions/__pycache__/._von_mises_fisher.cpython-37.pyc
- Supplementary_material/code/hyperspherical_vae/distributions/__pycache__/hyperspherical_uniform.cpython-37.pyc
- __MACOSX/Supplementary_material/code/hyperspherical_vae/distributions/__pycache__/._hyperspherical_uniform.cpython-37.pyc
- Supplementary_material/code/hyperspherical_vae/distributions/__pycache__/__init__.cpython-37.pyc
- __MACOSX/Supplementary_material/code/hyperspherical_vae/distributions/__pycache__/.___init__.cpython-37.pyc
