# Supplementary material
Source: ML conference proceedings conference paper supplement (https://proceedings.neurips.cc/paper_files/paper/2022/hash/6d5e035724687454549b97d6c805dc84-Abstract.html)
Supplement: Supplementary file 1 [file 6d5e035724687454549b97d6c805dc84-Supplemental-Conference.zip › Supplementary_material/code/hyperspherical_vae/ops/__init__.py]

# code from: https://github.com/nicola-decao/s-vae-pytorch

from hyperspherical_vae.ops.ive import ive
