# Supplementary material
Source: ML conference proceedings conference paper supplement (https://proceedings.neurips.cc/paper_files/paper/2022/hash/6d5e035724687454549b97d6c805dc84-Abstract.html)
Supplement: Supplementary file 1 [file 6d5e035724687454549b97d6c805dc84-Supplemental-Conference.zip › Supplementary_material/code/hyperspherical_vae/ops/ive.py]

# code from: https://github.com/nicola-decao/s-vae-pytorch

import torch
import numpy as np
import scipy.special
from numbers import Number


class IveFunction(torch.autograd.Function):
    @staticmethod
    def forward(self, v, z):

        assert isinstance(v, Number), "v must be a scalar"

        self.save_for_backward(z)
        self.v = v
        z_cpu = z.data.cpu().numpy()

        if np.isclose(v, 0):
            output = scipy.special.i0e(z_cpu, dtype=z_cpu.dtype)
        elif np.isclose(v, 1):
            output = scipy.special.i1e(z_cpu, dtype=z_cpu.dtype)
        else:  #  v > 0
            output = scipy.special.ive(v, z_cpu, dtype=z_cpu.dtype)
        #         else:
        #             print(v, type(v), np.isclose(v, 0))
        #             raise RuntimeError('v must be >= 0, it is {}'.format(v))

        return torch.Tensor(output).to(z.device)

    @staticmethod
    def backward(self, grad_output):
        z = self.saved_tensors[-1]
        return (
            None,
            grad_output * (ive(self.v - 1, z) - ive(self.v, z) * (self.v + z) / z),
        )


class Ive(torch.nn.Module):
    def __init__(self, v):
        super(Ive, self).__init__()
        self.v = v

    def forward(self, z):
        return ive(self.v, z)


ive = IveFunction.apply


##########
# The below provided approximations were provided in the
# respective source papers, to improve the stability of
# the Bessel fractions.
# I_(v/2)(k) / I_(v/2 - 1)(k)

# source: https://arxiv.org/pdf/1606.02008.pdf
def ive_fraction_approx(v, z):
    # I_(v/2)(k) / I_(v/2 - 1)(k) >= z / (v-1 + ((v+1)^2 + z^2)^0.5
    return z / (v - 1 + torch.pow(torch.pow(v + 1, 2) + torch.pow(z, 2), 0.5))


# source: https://arxiv.org/pdf/1902.02603.pdf
def ive_fraction_approx2(v, z, eps=1e-20):
    def delta_a(a):
        lamb = v + (a - 1.0) / 2.0
        return (v - 0.5) + lamb / (
            2 * torch.sqrt((torch.pow(lamb, 2) + torch.pow(z, 2)).clamp(eps))
        )

    delta_0 = delta_a(0.0)
    delta_2 = delta_a(2.0)
    B_0 = z / (
        delta_0 + torch.sqrt((torch.pow(delta_0, 2) + torch.pow(z, 2))).clamp(eps)
    )
    B_2 = z / (
        delta_2 + torch.sqrt((torch.pow(delta_2, 2) + torch.pow(z, 2))).clamp(eps)
    )

    return (B_0 + B_2) / 2.0
