# Supplementary material
Source: ML conference proceedings conference paper supplement (https://proceedings.neurips.cc/paper_files/paper/2022/hash/6d5e035724687454549b97d6c805dc84-Abstract.html)
Supplement: Supplementary file 1 [file 6d5e035724687454549b97d6c805dc84-Supplemental-Conference.zip › Supplementary_material/code/myenv/__init__.py]

from gym.envs.registration import register

register(
    id='MyPendulum-v0',
    entry_point='myenv.pendulum:PendulumEnv',
)

register(
    id='MyMassSpringDamper-v0',
    entry_point='myenv.massspringdamper:MassSpringDamperEnv',
)

register(
    id='My_FA_Acrobot-v0',
    entry_point='myenv.fa_acrobot:AcrobotEnv',
)

register(
    id='My_FA_CartPole-v0',
    entry_point='myenv.fa_cartpole:CartPoleEnv',
)

register(
    id='MyTwoBody-v0',
    entry_point='myenv.twobody:TwoBodyEnv',
)
