# Supplementary material
Source: ML conference proceedings conference paper supplement (https://proceedings.neurips.cc/paper_files/paper/2022/hash/6d5e035724687454549b97d6c805dc84-Abstract.html)
Supplement: Supplementary file 1 [file 6d5e035724687454549b97d6c805dc84-Supplemental-Conference.zip › Supplementary_material/code/README.md]

---

<div align="center">    
 
# This code is based on this source:
# Unsupervised Learning of Lagrangian Dynamics from Images for Prediction and Control

Yaofeng Desmond Zhong, Naomi Ehrich Leonard | 2020

[![Paper](http://img.shields.io/badge/paper-arxiv.2007.01926-B31B1B.svg)](https://arxiv.org/abs/2007.01926)
[![Conference](http://img.shields.io/badge/NeurIPS-2020-4b44ce.svg)](https://arxiv.org/abs/2007.01926)

More details can be found in their paper.
