# Supplementary material
Source: ML conference proceedings conference paper supplement (https://proceedings.neurips.cc/paper_files/paper/2022/hash/6d5e035724687454549b97d6c805dc84-Abstract.html)
Supplement: Supplementary file 1 [file 6d5e035724687454549b97d6c805dc84-Supplemental-Conference.zip › Supplementary_material/code/requirements.txt]

gym>=0.17.1
imageio>=2.8.0
jupyter>=1.0.0
matplotlib>=3.2.0
numpy>=1.18.1
pytorch-lightning>=0.8.5
scikit-image>=0.16.2
scipy>=1.4.1
tensorboard>=2.2.0
torchdiffeq>=0.0.1
